# Supplementary material
Source: MDPI journal article supplement (https://www.mdpi.com/2072-4292/14/4/985)
Supplement: s1 [file s1]

## Supplementary material

**Table S1.** Summary of information (number and location), lake area changes (average area and standard deviation during 2000±2020). Statistically significant correlations and contributions are annotated with \* and \*\* represents  $p < 0.01$  and \* represents  $p < 0.05$ .

| Num       | Lon    | Lat   | Rate of change (yr. <sup>-1</sup> ) |        |        | M-K test (Z) | Num  | Lon    | Lat   | Rate of change (yr. <sup>-1</sup> ) |       |        | M-K test (Z) |
|-----------|--------|-------|-------------------------------------|--------|--------|--------------|------|--------|-------|-------------------------------------|-------|--------|--------------|
|           |        |       | Ave ± Std. (km <sup>2</sup> )       | Rate   | R      |              |      |        |       | Ave ± Std. (km <sup>2</sup> )       | Rate  | R      |              |
| Class I   |        |       |                                     |        |        |              | D072 | 114.20 | 30.23 | 20.94±6.90                          | 0.97  | 0.52*  | 2.11*        |
| A001      | 118.87 | 31.47 | 149.91±22.96                        | 0.18   | 0.38   | 1.66*        | D073 | 114.23 | 30.13 | 0.59±0.46                           | 0.07  | 0.12   | 0.37         |
| A002      | 116.30 | 29.06 | 988.70±309.81                       | -29.09 | -0.50* | -1.64*       | D074 | 114.22 | 30.03 | 73.41±11.79                         | 0.90  | 0.40   | 2.51**       |
| A003      | 112.73 | 29.06 | 325.70±71.01                        | -2.89  | 0.02   | 0.45         | D075 | 113.98 | 30.42 | 0.99±0.32                           | 0.01  | 0.05   | 0.33         |
| A004      | 113.87 | 29.90 | 2.42±0.88                           | 0.14   | 0.38   | 1.63         | D076 | 114.04 | 30.39 | 0.67±0.45                           | 0.05  | 0.59** | 2.64**       |
| Class II  |        |       |                                     |        |        |              | D077 | 113.83 | 30.31 | 8.47±3.84                           | 0.56  | 0.73** | 2.81**       |
| B001      | 118.57 | 33.31 | 1271.87±118.40                      | -2.99  | -0.12  | -1.60        | D078 | 113.78 | 30.16 | 0.42±0.68                           | -0.07 | -0.08  | -0.77        |
| B002      | 118.40 | 33.03 | 5.73±5.16                           | -0.10  | -0.46* | -1.96*       | D079 | 113.94 | 30.14 | 0.59±0.72                           | 0.01  | -0.01  | 0.00         |
| B003      | 118.22 | 32.91 | 19.07±8.22                          | 0.50   | -0.30  | -1.15        | D080 | 114.08 | 29.94 | 28.85±4.83                          | -0.06 | 0.08   | 0.57         |
| B004      | 118.08 | 32.96 | 63.10±5.50                          | 0.11   | -0.26  | -1.00        | D081 | 113.91 | 29.95 | 1.33±0.39                           | 0.03  | 0.49*  | 2.88**       |
| B005      | 117.82 | 32.98 | 17.95±5.10                          | 0.67   | 0.38   | 1.57         | D082 | 113.94 | 30.54 | 0.10±0.10                           | 0.01  | 0.58** | 2.55**       |
| B006      | 117.40 | 32.91 | 0.65±0.38                           | -0.05  | -0.34  | -1.49        | D083 | 113.67 | 30.82 | 4.69±2.47                           | 0.53  | 0.41   | 1.27         |
| B007      | 117.24 | 32.86 | 2.49±1.19                           | -0.02  | 0.16   | 0.88         | D084 | 113.51 | 30.83 | 3.16±1.04                           | 0.18  | 0.62** | 3.42**       |
| Class III |        |       |                                     |        |        |              | D085 | 113.25 | 30.75 | 0.36±0.54                           | 0.00  | -0.10  | -0.20        |
| C001      | 116.18 | 35.99 | 97.94±8.20                          | 0.32   | -0.02  | -0.12        | D086 | 113.76 | 29.85 | 1.12±0.30                           | 0.03  | 0.52*  | 2.25*        |
| C002      | 116.94 | 34.87 | 380.73±164.68                       | 5.55   | 0.04   | -1.06        | D087 | 113.33 | 29.85 | 239.28±35.67                        | 2.80  | 0.03   | 0.21         |
| C003      | 118.03 | 34.21 | 3.86±2.55                           | 0.29   | 0.51*  | 2.30*        | D088 | 113.55 | 29.70 | 35.66±3.97                          | -0.15 | -0.38  | -1.81*       |
| C004      | 118.18 | 34.10 | 221.61±13.93                        | 1.78   | 0.47*  | 0.91         | D089 | 113.40 | 29.66 | 2.18±0.50                           | -0.01 | -0.04  | -0.27        |
| C005      | 119.13 | 33.24 | 32.78±8.31                          | -0.24  | 0.68** | -3.47**      | D090 | 113.19 | 29.44 | 3.53±0.39                           | 0.05  | 0.14   | -0.03        |
| C006      | 119.29 | 33.13 | 4.20±2.58                           | 0.07   | -0.21  | -0.12        | D091 | 113.12 | 29.34 | 4.39±0.61                           | -0.02 | 0.12   | 0.00         |
| C007      | 119.28 | 32.85 | 563.67±53.46                        | 2.21   | 0.13   | -0.88        | D092 | 112.86 | 29.67 | 2.14±0.38                           | 0.02  | -0.05  | 0.12         |
| C008      | 119.43 | 32.63 | 53.97±14.22                         | 1.45   | 0.47*  | 2.02*        | D093 | 112.70 | 29.69 | 0.24±0.20                           | 0.00  | 0.05   | 0.18         |
| C009      | 119.04 | 32.80 | 2.18±2.09                           | -0.13  | 0.71** | -4.35**      | D094 | 112.65 | 29.66 | 0.40±0.41                           | 0.03  | -0.32  | -0.88        |
| Class IV  |        |       |                                     |        |        |              | D095 | 112.46 | 29.59 | 1.43±1.56                           | 0.14  | -0.10  | 0.37         |
| D001      | 120.22 | 31.20 | 2226.50±28.61                       | 0.03   | -0.20  | -0.82        | D096 | 112.64 | 29.37 | 13.82±1.01                          | 0.18  | 0.52*  | 2.54**       |
| D002      | 119.82 | 31.60 | 140.71±9.09                         | 1.15   | 0.66** | 2.69**       | D097 | 112.51 | 29.40 | 0.54±0.56                           | 0.00  | 0.65** | -2.94**      |
| D003      | 119.55 | 31.62 | 69.91±7.56                          | 0.25   | -0.21  | -0.66        | D098 | 112.51 | 29.21 | 69.97±3.02                          | 0.24  | -0.09  | 0.42         |
| D004      | 118.91 | 31.28 | 22.30±2.31                          | 0.20   | 0.60** | 2.54**       | D099 | 113.06 | 29.05 | 0.48±0.32                           | 0.03  | 0.55** | 2.55**       |
| D005      | 119.06 | 31.20 | 0.29±0.47                           | -0.04  | -0.51* | -1.88*       | D100 | 112.28 | 29.92 | 3.21±4.95                           | -0.04 | 0.61** | -3.21**      |
| D006      | 118.97 | 31.11 | 118.40±15.46                        | 2.59   | 0.36   | 1.06         | D101 | 112.30 | 29.85 | 0.88±1.26                           | -0.10 | 0.79** | -2.85**      |
| D007      | 118.27 | 31.25 | 3.32±0.76                           | 0.03   | 0.56** | 2.33**       | D102 | 112.08 | 30.07 | 2.60±0.77                           | 0.01  | -0.32  | -0.61        |
| D008      | 117.38 | 31.18 | 3.69±3.17                           | 0.43   | -0.09  | -0.85        | D103 | 111.81 | 30.11 | 3.07±0.59                           | -0.04 | -0.42  | -2.18*       |
| D009      | 117.64 | 31.02 | 1.93±1.62                           | 0.07   | -0.16  | -0.94        | D104 | 111.87 | 29.98 | 2.23±0.36                           | 0.00  | 0.30   | 1.22         |
| D010      | 117.63 | 30.93 | 8.57±0.93                           | 0.16   | 0.52*  | 2.42**       | D105 | 111.95 | 29.84 | 1.63±0.53                           | 0.05  | 0.23   | 0.45         |
| D011      | 117.67 | 30.90 | 5.34±5.01                           | 0.44   | 0.39   | 1.42         | D106 | 111.88 | 29.72 | 9.99±1.03                           | 0.05  | 0.18   | 1.97*        |
| D012      | 117.77 | 30.78 | 1.78±0.84                           | 0.07   | 0.73** | 3.35**       | D107 | 112.03 | 29.43 | 13.84±0.61                          | -0.04 | -0.15  | -0.06        |
| D013      | 117.76 | 30.74 | 3.15±1.40                           | 0.12   | 0.83** | 4.12**       | D108 | 111.93 | 29.40 | 4.70±1.28                           | 0.05  | -0.12  | 0.60         |
| D014      | 117.38 | 30.81 | 26.34±4.28                          | 0.35   | 0.16   | 0.94         | D109 | 112.00 | 29.26 | 1.05±0.84                           | 0.10  | -0.36  | -1.56        |
| D015      | 117.53 | 30.66 | 2.16±0.69                           | 0.04   | 0.52*  | 2.24*        | D110 | 112.14 | 29.07 | 1.37±1.58                           | -0.01 | 0.67** | -2.66**      |
| D016      | 117.38 | 30.57 | 0.60±0.17                           | -0.01  | -0.23  | -0.49        | D111 | 112.00 | 29.14 | 1.37±0.95                           | 0.01  | -0.46* | -1.64*       |
| D017      | 117.08 | 30.84 | 75.14±19.77                         | 2.77   | 0.75** | 3.90**       | D112 | 111.90 | 29.16 | 1.43±1.11                           | -0.07 | 0.79** | -2.97**      |
| D018      | 117.16 | 30.64 | 15.40±2.94                          | 0.27   | 0.89** | 4.26**       | D113 | 111.86 | 29.07 | 3.56±1.97                           | 0.10  | 0.33   | 0.42         |
| D019      | 117.11 | 30.64 | 4.50±1.01                           | -0.08  | -0.44* | -2.06*       | D114 | 111.73 | 29.09 | 4.45±0.93                           | 0.08  | 0.80** | 3.93**       |
| D020      | 116.91 | 30.75 | 0.65±0.64                           | 0.08   | 0.87** | 4.39**       | D115 | 112.68 | 28.48 | 0.12±0.14                           | -0.01 | -0.40  | -1.77 *      |
| D021      | 116.87 | 30.50 | 0.29±0.67                           | 0.06   | 0.56** | 1.03         | D116 | 112.59 | 28.55 | 3.68±0.66                           | 0.08  | -0.05  | 0.18         |
| D022      | 117.21 | 30.43 | 0.71±0.86                           | 0.01   | 0.48*  | 2.84**       | D117 | 112.35 | 28.72 | 0.68±0.27                           | 0.04  | 0.22   | 0.85         |
| D023      | 117.07 | 30.38 | 44.40±7.07                          | 0.17   | 0.47*  | 1.94*        | D118 | 112.03 | 28.82 | 0.34±0.42                           | 0.00  | 0.35   | 1.27         |
| D024      | 116.60 | 30.42 | 0.57±0.20                           | -0.02  | 0.03   | 0.03         | D119 | 120.69 | 31.65 | 2.41±0.95                           | -0.04 | 0.66** | -2.90**      |
| D025      | 116.71 | 30.28 | 39.03±7.16                          | 0.40   | 0.51*  | 2.36**       | D120 | 120.74 | 31.59 | 10.57±1.94                          | -0.10 | 0.77** | -3.11**      |
| D026      | 116.93 | 30.14 | 1.69±0.48                           | -0.07  | 0.57** | -2.76**      | D121 | 120.76 | 31.43 | 77.66±8.67                          | -0.41 | -0.03  | -0.57        |
| D027      | 116.44 | 30.17 | 94.45±8.22                          | 0.71   | 0.75** | 3.32**       | D122 | 120.86 | 31.41 | 2.87±0.79                           | 0.02  | 0.32   | 0.51         |
| D028      | 116.60 | 30.17 | 0.96±0.30                           | -0.02  | 0.24   | 0.67         | D123 | 120.57 | 31.52 | 1.70±0.59                           | 0.04  | 0.09   | 1.03         |
| D029      | 116.73 | 30.01 | 15.69±1.37                          | 0.07   | 0.50*  | 2.14*        | D124 | 120.57 | 31.48 | 4.15±1.08                           | -0.02 | -0.25  | -1.39        |
| D030      | 116.38 | 30.02 | 155.45±48.99                        | 5.94   | 0.49*  | 2.33**       | D125 | 120.70 | 31.31 | 3.24±1.01                           | -0.01 | 0.46*  | 2.00*        |
| D031      | 116.13 | 29.96 | 199.88±33.40                        | 3.02   | 0.62** | 2.57**       | D126 | 120.70 | 31.27 | 4.99±1.56                           | 0.00  | 0.58** | 1.09         |
| D032      | 116.34 | 29.80 | 2.43±0.34                           | -0.04  | -0.22  | -0.70        | D127 | 120.82 | 31.21 | 33.31±3.89                          | -0.05 | 0.21   | -0.03        |

|      |        |       |              |       |         |         |          |        |       |             |       |         |         |
|------|--------|-------|--------------|-------|---------|---------|----------|--------|-------|-------------|-------|---------|---------|
| D033 | 115.81 | 29.97 | 19.32±1.00   | -0.01 | -0.13   | -0.64   | D128     | 120.93 | 31.20 | 1.48±0.65   | -0.01 | -0.54*  | -1.79*  |
| D034 | 115.93 | 29.68 | 9.04±0.70    | 0.02  | 0.29    | 1.09    | D129     | 120.82 | 31.13 | 2.94±1.11   | 0.06  | 0.28    | 1.60    |
| D035 | 115.84 | 29.69 | 27.88±1.87   | 0.27  | 0.35    | 0.88    | D130     | 120.96 | 31.12 | 48.81±1.65  | 0.08  | -0.11   | -0.51   |
| D036 | 115.68 | 29.78 | 20.35±4.09   | 0.36  | 0.26    | 1.33    | D131     | 120.90 | 31.14 | 1.65±0.71   | 0.06  | 0.42    | 2.24*   |
| D037 | 115.59 | 29.91 | 9.43±0.75    | 0.00  | 0.13    | 0.21    | D132     | 120.88 | 31.07 | 8.61±0.55   | 0.04  | -0.37   | -2.06*  |
| D038 | 115.43 | 30.11 | 5.67±0.96    | 0.00  | -0.20   | -0.24   | D133     | 120.82 | 31.05 | 0.14±0.20   | 0.00  | -0.35   | -1.45   |
| D039 | 115.39 | 29.82 | 8.68±0.69    | 0.00  | 0.15    | 0.39    | D134     | 120.80 | 31.01 | 2.32±0.92   | 0.08  | 0.20    | 0.91    |
| D040 | 115.33 | 29.87 | 29.79±3.13   | 0.29  | 0.56**  | 2.54**  | D135     | 120.51 | 30.97 | 2.29±1.18   | 0.13  | 0.75**  | 3.27**  |
| D041 | 115.28 | 29.92 | 1.01±0.27    | -0.02 | 0.06    | 0.40    | D136     | 120.55 | 30.93 | 4.86±0.53   | 0.06  | 0.22    | 0.64    |
| D042 | 115.18 | 29.84 | 1.47±0.50    | 0.03  | 0.59**  | 2.48**  | D137     | 119.80 | 31.37 | 7.12±1.56   | 0.09  | -0.11   | -0.73   |
| D043 | 115.09 | 29.85 | 1.14±0.33    | 0.03  | 0.44*   | 2.27*   | D138     | 112.54 | 30.45 | 0.57±0.46   | 0.00  | -0.35   | -1.84*  |
| D044 | 115.25 | 30.05 | 2.19±2.00    | 0.19  | -0.42   | -1.94*  | D139     | 112.39 | 30.43 | 73.91±10.74 | 1.92  | 0.58**  | 2.51**  |
| D045 | 115.09 | 30.10 | 34.96±5.41   | 0.44  | 0.63**  | 2.81**  | D140     | 116.06 | 28.70 | 6.53±1.28   | 0.00  | -0.17   | -0.30   |
| D046 | 115.16 | 30.26 | 2.88±0.73    | 0.17  | 0.65**  | 2.67**  | D141     | 117.21 | 30.74 | 1.03±0.65   | -0.02 | 0.15    | 0.33    |
| D047 | 115.03 | 30.30 | 0.67±0.46    | -0.06 | -0.42   | -0.82   | D142     | 116.19 | 28.60 | 0.17±0.16   | -0.02 | -0.42   | -0.79   |
| D048 | 114.99 | 30.27 | 1.19±0.42    | -0.07 | -0.63** | -2.85** | D143     | 117.53 | 31.57 | 741.29±5.47 | 0.18  | -0.33   | -1.24   |
| D049 | 115.05 | 30.21 | 1.28±0.57    | -0.08 | -0.76** | -3.76** | D144     | 114.18 | 30.66 | 0.14±0.15   | 0.01  | 0.85**  | 3.96**  |
| D050 | 115.07 | 30.42 | 0.39±0.25    | 0.00  | -0.05   | -0.46   | Class V  |        |       |             |       |         |         |
| D051 | 114.94 | 30.47 | 0.60±0.37    | 0.01  | 0.02    | 0.67    | E001     | 117.94 | 33.26 | 7.61±2.16   | -0.22 | -0.73** | -3.42** |
| D052 | 114.79 | 30.31 | 10.21±1.61   | 0.15  | 0.05    | 0.33    | E002     | 117.81 | 33.21 | 15.58±1.67  | 0.17  | 0.02    | -0.12   |
| D053 | 114.70 | 30.65 | 22.47±9.53   | 0.60  | -0.20   | -0.33   | E003     | 117.67 | 33.14 | 6.44±4.04   | 0.07  | 0.49*   | 1.66*   |
| D054 | 114.72 | 30.46 | 5.08±0.85    | 0.09  | 0.44*   | 2.85**  | E004     | 117.14 | 33.06 | 0.60±0.63   | 0.00  | -0.29   | -0.33   |
| D055 | 114.72 | 30.25 | 24.88±3.14   | 0.28  | 0.55**  | 2.54**  | E005     | 117.18 | 32.63 | 16.47±5.02  | 0.07  | -0.36   | -1.48   |
| D056 | 114.50 | 30.81 | 10.60±3.02   | 0.36  | 0.26    | 1.42    | E006     | 116.59 | 32.72 | 3.43±1.70   | -0.05 | -0.41   | -2.78** |
| D057 | 114.48 | 30.57 | 1.95±0.60    | -0.05 | -0.46*  | -1.67*  | E007     | 116.60 | 32.60 | 17.60±8.28  | 0.17  | -0.68** | -3.23** |
| D058 | 114.40 | 30.56 | 15.89±1.68   | -0.11 | -0.51*  | -2.75** | E008     | 116.88 | 32.41 | 91.80±13.17 | 0.47  | -0.32   | -1.54   |
| D059 | 114.36 | 30.49 | 2.65±0.43    | -0.03 | -0.25   | 0.00    | E009     | 116.68 | 32.29 | 26.27±3.02  | -0.06 | -0.05   | -0.94   |
| D060 | 114.64 | 30.47 | 0.88±0.37    | -0.04 | -0.49*  | -1.94*  | E010     | 116.26 | 32.57 | 4.58±1.19   | 0.04  | -0.16   | -0.45   |
| D061 | 114.63 | 30.41 | 1.49±0.67    | 0.05  | 0.34    | 1.63    | E011     | 116.36 | 32.26 | 79.79±6.70  | 0.34  | -0.11   | -0.15   |
| D062 | 114.58 | 30.39 | 5.26±1.84    | 0.08  | 0.02    | 0.91    | E012     | 116.20 | 32.32 | 47.12±17.57 | -0.68 | -0.40   | -1.78*  |
| D063 | 114.51 | 30.23 | 176.57±31.60 | 2.22  | 0.39    | 1.96*   | Class VI |        |       |             |       |         |         |
| D064 | 114.36 | 30.42 | 20.84±2.33   | 0.21  | 0.24    | 0.21    | F001     | 119.82 | 33.08 | 1.64±2.01   | -0.02 | -0.63** | -4.27** |
| D065 | 114.28 | 30.44 | 1.64±0.77    | 0.10  | 0.61**  | 2.81**  | F002     | 119.81 | 33.15 | 11.82±6.11  | -0.51 | -0.77** | -3.41** |
| D066 | 114.24 | 30.43 | 0.04±0.14    | 0.00  | -0.31   | -1.80*  | F003     | 112.62 | 31.14 | 5.45±1.90   | 0.32  | 0.74**  | 3.33**  |
| D067 | 114.28 | 30.74 | 4.66±1.18    | 0.27  | 0.60**  | 3.13**  | F004     | 118.00 | 30.36 | 17.93±2.80  | 0.06  | 0.25    | 1.67*   |
| D068 | 114.17 | 30.80 | 2.89±1.52    | 0.25  | 0.68**  | 3.49**  | F005     | 116.75 | 31.29 | 12.35±2.02  | 0.15  | 0.37    | 1.42    |
| D069 | 114.07 | 30.86 | 14.32±1.28   | 0.06  | -0.05   | -0.67   | F006     | 116.18 | 30.51 | 5.39±1.79   | 0.11  | 0.40    | 1.60    |
| D070 | 114.01 | 30.88 | 3.16±0.69    | 0.05  | 0.46*   | 2.51**  | F007     | 115.78 | 30.51 | 0.14±0.15   | 0.00  | 0.14    | 0.44    |
| D071 | 114.08 | 30.52 | 6.37±1.26    | 0.01  | -0.12   | 0.36    | F008     | 115.28 | 29.28 | 97.18±16.91 | -0.27 | 0.20    | 0.75    |
